# Supplementary material
Source: publisher figshare collection journal article supplement (https://plos.figshare.com/articles/dataset/_/6167399)
Supplement: Supplementary file [file 1]

## S1 Genotypes

### Fig 1

(A,B) *y w hsFlp/y w;; FRT82 ubiGFP/FRT82 iso, y w hsFlp/y w;; FRT82 ubiGFP/FRT82 Tsc1<sup>Q87X</sup>*

(C) *y w eyFlp/y w;; FRT82 ubiGFP/FRT82 iso, y w eyFlp/y w;; FRT82 ubiGFP/FRT82 Tsc1<sup>Q87X</sup>*, (D) *y w eyFlp/y w;; FRT82 w<sup>+</sup> cl/FRT82 iso, y w eyFlp/y w;; FRT82 w<sup>+</sup> cl/FRT82 Tsc1<sup>Q87X</sup>*

### Fig 2

(A) *y w eyFlp/y w;; FRT82 w<sup>+</sup> cl/FRT82 iso, y w eyFlp/y w;; FRT82 w<sup>+</sup> cl/FRT82 Tsc1<sup>Q87X</sup>*

### Fig 3

(A) *y w eyFlp/y w;; FRT82 w<sup>+</sup> cl/FRT82 iso, y w eyFlp/y w;; FRT82 w<sup>+</sup> cl/FRT82 Tsc1<sup>Q87X</sup>*

(B) *y w eyFlp/y w;; FRT82 ubiGFP/FRT82 iso, y w eyFlp/y w;; FRT82 ubiGFP/FRT82 Rheb<sup>2G5</sup>, y w eyFlp/y w;; FRT82 ubiGFP/FRT82 Tsc1<sup>Q87X</sup>, y w eyFlp/y w;; FRT82 ubiGFP/FRT82 Rheb<sup>2G5</sup> Tsc1<sup>Q87X</sup>*

(C) *y w hsFlp UAS-GFP/ y w;; tubGal4 FRT82 tubGal80/FRT82 iso, y w hsFlp UAS-GFP/ y w;; tubGal4 FRT82 tubGal80/FRT82 Tsc1<sup>Q87X</sup>, y w hsFlp UAS-GFP/ y w; UAS-Raptor<sup>Ri/+</sup>; tubGal4 FRT82 tubGal80/FRT82 iso, y w hsFlp UAS-GFP/ y w; UAS-Raptor<sup>Ri/+</sup>; tubGal4 FRT82 tubGal80/FRT82 Tsc1<sup>Q87X</sup>, y w hsFlp UAS-GFP/UAS-S6K<sup>Ri</sup>; tubGal4 FRT82 tubGal80/ FRT82 iso, y w hsFlp UAS-GFP/UAS-S6K<sup>Ri</sup>; tubGal4 FRT82 tubGal80/ FRT82 Tsc1<sup>Q87X</sup>*

**Fig 4**

(A) *y w hsFlp/y w;; FRT82 ubiGFP/FRT82 Tsc1<sup>Q87X</sup>, y w hsFlp/y w; FRT40 ubiGFP/FRT40 PTEN<sup>117</sup>*

(B) *y w eyFlp/y w;; FRT82 w<sup>+</sup> cl/FRT82 iso, y w eyFlp/y w;; FRT82 w<sup>+</sup> cl/FRT82 Tsc1<sup>Q87X</sup>*

(C) *y w hsFlp/y w;; FRT82 ubiGFP/FRT82 iso, y w hsFlp/y w;; FRT82 ubiGFP/FRT82 Tsc1<sup>Q87X</sup>, y w hsFlp/y w; FRT40 ubiGFP/FRT40 PTEN<sup>117</sup>*

(D) *y w eyFlp Act>CD2>Gal4/y w;; UAS-lacZ /+, y w eyFlp Act>CD2>Gal4/y w;; UAS-Tsc1<sup>Ri</sup>/+, y w eyFlp Act>CD2>Gal4/y w; UAS-PTEN<sup>Ri</sup>/+, y w eyFlp Act>CD2>Gal4/y w; UAS-cherry-dFoxO/+, y w eyFlp Act>CD2>Gal4/y w; UAS-cherry-dFoxO/+; UAS-Tsc1<sup>Ri</sup>/+, y w eyFlp Act>CD2>Gal4/y w; UAS-cherry-dFoxO/UAS-PTEN<sup>Ri</sup>*

**Fig 5**

(A) *y w eyFlp/y w;; FRT82 ubiGFP/FRT82 iso, y w eyFlp/y w;; FRT82 ubiGFP/FRT82 Tsc1<sup>Q87X</sup>, y w eyFlp/y w; FRT40 ubiGFP/FRT40 PTEN<sup>117</sup>, y w eyFlp/y w;; FRT82 ubiGFP/FRT82 FoxO<sup>25</sup>, y w eyFlp/y w;; FRT82 ubiGFP/FRT82 Tsc1<sup>Q87X</sup> FoxO<sup>25</sup>, y w eyFlp/y w; FRT40 ubiGFP/FRT40 PTEN<sup>117</sup>; FRT82 ubiGFP/FRT82 FoxO<sup>25</sup>*

(B) *y w eyFlp/y w;; FRT82 w<sup>+</sup> cl/FRT82 iso, y w eyFlp/y w;; FRT82 w<sup>+</sup> cl/FRT82 FoxO<sup>25</sup>, y w eyFlp/y w;; FRT82 w<sup>+</sup> cl/FRT82 Tsc1<sup>Q87X</sup>, y w eyFlp/y w;; FRT82 w<sup>+</sup> cl/FRT82 Tsc1<sup>Q87X</sup> FoxO<sup>25</sup>*

(C) *y w hsFlp/y w;; FRT82 ubiGFP/FRT82 iso, y w hsFlp/y w;; FRT82 ubiGFP/FRT82 FoxO<sup>25</sup>, y w hsFlp/y w;; FRT82 ubiGFP/FRT82 Tsc1<sup>Q87X</sup>, y w hsFlp/y w;; FRT82 ubiGFP/FRT82 Tsc1<sup>Q87X</sup> FoxO<sup>25</sup>*

**Fig 6**

(A) *y w hsFlp/y w;; FRT82 ubiGFP/FRT82 FoxO<sup>Δ94</sup>, y w hsFlp/y w;; FRT82 ubiGFP/FRT82 Tsc1<sup>Q87X</sup>, y w hsFlp/y w;; FRT82 ubiGFP/FRT82 Tsc1<sup>Q87X</sup> FoxO<sup>Δ94</sup>*

(B) *y w hsFlp UAS-GFP/y w;; tubGal4 FRT82 tubGal80/FRT82 Tsc1<sup>Q87X</sup>, y w hsFlp UAS-GFP/y w; UAS-p35/+; tubGal4 FRT82 tubGal80/FRT82 Tsc1<sup>Q87X</sup>, y w hsFlp UAS-GFP/y w;; tubGal4 FRT82 tubGal80/FRT82 Tsc1<sup>Q87X</sup> FoxO<sup>25</sup>, y w hsFlp UAS-GFP/y w; UAS-p35/+; tubGal4 FRT82 tubGal80/FRT82 Tsc1<sup>Q87X</sup> FoxO<sup>25</sup>*

**Fig 7**

(A,A') *y w eyFlp/y w;; FRT82 w<sup>+</sup> cl/FRT82 iso, y w eyFlp/y w;; FRT82 w<sup>+</sup> cl/FRT82 FoxO<sup>25</sup>, y w eyFlp/y w;; FRT82 w<sup>+</sup> cl/FRT82 Tsc1<sup>Q87X</sup>, y w eyFlp/y w;; FRT82 w<sup>+</sup> cl/FRT82 Tsc1<sup>Q87X</sup> FoxO<sup>25</sup>*

(B) *y w hsFlp/y w;; FRT82 ubiGFP/FRT82 iso, y w hsFlp/y w;; FRT82 ubiGFP/FRT82 FoxO<sup>25</sup>, y w hsFlp/y w;; FRT82 ubiGFP/FRT82 Tsc1<sup>Q87X</sup>, y w hsFlp/y w;; FRT82 ubiGFP/FRT82 Tsc1<sup>Q87X</sup> FoxO<sup>25</sup>*

**Fig 8**

(A-D'') *y w eyFlp Act>CD2>Gal4/y w; UAS-FoxO<sup>Ri/+</sup>; UAS-Tsc1<sup>Ri/+</sup>*

(E-H) *y w eyFlp Act>CD2>Gal4/y w; UAS-CG33920<sup>Ri/+</sup>, y w eyFlp Act>CD2>Gal4/y w; UAS-FoxO<sup>Ri/+</sup>, y w eyFlp Act>CD2>Gal4/y w;; UAS-Tsc1<sup>Ri/+</sup>, y w eyFlp Act>CD2>Gal4/y w; UAS-FoxO<sup>Ri/+</sup>; UAS-Tsc1<sup>Ri/+</sup>, y w eyFlp Act>CD2>Gal4/y w; UAS-PTEN<sup>Ri/+</sup>, y w eyFlp Act>CD2>Gal4/y w; UAS-PTEN<sup>Ri</sup>/UAS-FoxO<sup>Ri</sup>*

### S1 Fig

(A,A') *y w eyFlp Act>CD2>Gal4/y w;; UAS-lacZ/+; y w eyFlp Act>CD2>Gal4/y w;; UAS-Tsc2<sup>Ri</sup>/+*

### S2 Fig

(A, A') *y w hsFlp/y w;; FRT82 ubiGFP/FRT82 Tsc1<sup>Q87X</sup>*

### S3 Fig

(A) *y w hsFlp UAS-GFP/y w;; tubGal4 FRT82 tubGal80/FRT82 Tsc1<sup>Q87X</sup>, y w hsFlp UAS-GFP/y w; UAS-p35/+; tubGal4 FRT82 tubGal80/FRT82 Tsc1<sup>Q87X</sup>*  
(B) *y w hsFlp/y w;; FRT82 ubiGFP/FRT82 Tsc1<sup>Q87X</sup>*

### S4 Fig

(A) *y w hsFlp UAS-GFP/y w;; tubGal4 FRT82 tubGal80/FRT82 iso, y w hsFlp UAS-GFP/y w; UAS-4EBP<sup>WT</sup>/+; tubGal4 FRT82 tubGal80/FRT82 iso, y w hsFlp UAS-GFP/y w; UAS-4EBP<sup>AA</sup>/+; tubGal4 FRT82 tubGal80/FRT82 iso , y w hsFlp UAS-GFP/y w;; tubGal4 FRT82 tubGal80/FRT82 Tsc1<sup>Q87X</sup>, y w hsFlp UAS-GFP/y w; UAS-4EBP<sup>WT</sup>/+; tubGal4 FRT82 tubGal80/FRT82 Tsc1<sup>Q87X</sup>, y w hsFlp UAS-GFP/y w; UAS-4EBP<sup>AA</sup>/+; tubGal4 FRT82 tubGal80/FRT82 Tsc1<sup>Q87X</sup>*

### S5 Fig

(A) *y w hsFlp UAS-GFP/y w; tub-Gal80 FRT40/FRT40 iso; tub-Gal4/EP-Rheb*  
(B) *y w eyFlp Act>CD2>Gal4/y w;; EP-Rheb/+*  
(C) *y w hsFlp UAS-GFP/y w; tub-Gal80 FRT40/FRT40 iso; tub-Gal4/EP-Rheb*

### S7 Fig

(A) *y w hsFlp/y w;; FRT82 ubiGFP/FRT82 iso, y w hsFlp/y w;; FRT82 ubiGFP/FRT82 Tsc1<sup>Q87X</sup>, y w hsFlp/y w;; FRT82 ubiGFP/FRT82 FoxO<sup>25</sup>, y w hsFlp/y w;; FRT82 ubiGFP/FRT82 Tsc1<sup>Q87X</sup> FoxO<sup>25</sup>*

(B) *y w hsFlp/y w;; FRT82 ubiGFP/FRT82 Tsc1<sup>Q87X</sup>, y w hsFlp/y w;; FRT82 ubiGFP/FRT82 Tsc1<sup>Q87X</sup> FoxO<sup>25</sup>*

### S8 Fig

(A,B) *y w eyFlp/y w;; FRT82 ubiGFP/FRT82 iso, y w eyFlp/y w;; FRT82 ubiGFP/FRT82 Tsc1<sup>Q87X</sup>, y w eyFlp/y w;; FRT82 ubiGFP/FRT82 PKB<sup>1</sup>, y w eyFlp/y w;; FRT82 ubiGFP/FRT82 Tsc1<sup>Q87X</sup> PKB<sup>1</sup>, y w eyFlp/y w;; FRT82 ubiGFP/FRT82 FoxO<sup>25</sup>, y w eyFlp/y w;; FRT82 ubiGFP/FRT82 Tsc1<sup>Q87X</sup> FoxO<sup>25</sup>, y w eyFlp/y w;; FRT82 ubiGFP/FRT82 PKB<sup>1</sup> FoxO<sup>25</sup>, y w eyFlp/y w;; FRT82 ubiGFP/FRT82 Tsc1<sup>Q87X</sup> PKB<sup>1</sup> FoxO<sup>25</sup>*

(C) *y w hsFlp/y w;; FRT82 ubiGFP/FRT82 Tsc1<sup>Q87X</sup>, y w hsFlp/y w;; FRT82 ubiGFP/FRT82 FoxO<sup>25</sup>, y w hsFlp/y w;; FRT82 ubiGFP/FRT82 Tsc1<sup>Q87X</sup> FoxO<sup>25</sup>*

### S9 Fig

*y w eyFlp/y w;; FRT82 w<sup>+</sup> cl/FRT82 iso, y w eyFlp/y w;; FRT82 w<sup>+</sup> cl/FRT82 FoxO<sup>25</sup>, y w eyFlp/y w;; FRT82 w<sup>+</sup> cl/FRT82 Tsc1<sup>Q87X</sup>, y w eyFlp/y w;; FRT82 w<sup>+</sup> cl/FRT82 Tsc1<sup>Q87X</sup> FoxO<sup>25</sup>*

### S10 Fig

(A) *y w eyFlp/y w;; FRT82 w<sup>+</sup> cl/FRT82 iso, y w eyFlp/y w;; FRT82 w<sup>+</sup> cl/FRT82 FoxO<sup>25</sup>, y w eyFlp/y w;; FRT82 w<sup>+</sup> cl/FRT82 Tsc1<sup>Q87X</sup>, y w eyFlp/y w;; FRT82 w<sup>+</sup>*

*cl/FRT82 Tsc1<sup>Q87X</sup> FoxO<sup>25</sup>*

(B) *y w eyFlp/y w;; FRT82 w<sup>+</sup> cl/FRT82 Tsc1<sup>Q87X</sup> FoxO<sup>25</sup>*

(C) *y w eyFlp Act>CD2>Gal4/y w; UAS-FoxO<sup>Ri/+</sup>; UAS-GFP/UAS-Tsc1<sup>Ri</sup>*

### **S1 Video**

*y w eyFlp Act>CD2>Gal4/y w; UAS-CG33920<sup>Ri/+</sup>, y w eyFlp Act>CD2>Gal4/y w;;  
UAS-Tsc1<sup>Ri/+</sup>*

### **S2 Video**

*y w eyFlp Act>CD2>Gal4/y w; UAS-CG33920<sup>Ri/+</sup>, y w eyFlp Act>CD2>Gal4/y w;  
UAS-FoxO<sup>Ri/+</sup>; UAS-Tsc1<sup>Ri/+</sup>*

### **S3 Video**

*y w eyFlp Act>CD2>Gal4/y w; UAS-CG33920<sup>Ri/+</sup>, y w eyFlp Act>CD2>Gal4/y w;  
UAS-PTEN<sup>Ri/+</sup>*

### **S4 Video**

*y w eyFlp Act>CD2>Gal4/y w; UAS-CG33920<sup>Ri/+</sup>, y w eyFlp Act>CD2>Gal4/y w;  
UAS-PTEN<sup>Ri</sup>/UAS-FoxO<sup>Ri</sup>*
